# Supplementary material for: Heterogeneous T cell motility behaviors emerge from a coupling between speed and turning in vivo
Source: eLife. 2020 May 19;9:e53933. doi: 10.7554/eLife.53933 (PMC7237209; doi:10.7554/eLife.53933)
Supplement: Figure 4—source data 2. — MSD by speed for each time interval, and error bounds. [file elife-53933-fig4-data2.txt]

speeds	tau=9	1.2792549188164493,1.8544026159392144,2.2082816244844974,2.5154860740094658,2.8897302978923687,3.1687677686957,3.4886252736487124,3.7824278735446732,4.169748467232764,4.743528565184621,5.229394127213837,5.835096141158295,6.448840102096082,7.303666431792725,8.060766454354505,8.986054576569272,10.28571577424452,11.249534165169184,12.49183009449053,14.733699633969406
D (median)	tau=9	0.5296959058166231,0.8232436888223353,1.823956003411714,1.3280313640267993,4.382427851853199,2.7070114957017726,6.657286332661843,6.877312933243755,8.068159275765513,15.190041870770326,15.249987979035515,22.29471659699626,25.627477751048627,43.32705134424998,48.27006468808234,57.06508926917993,84.67003900465753,97.21908944630663,129.02601039594123,194.81039589196348
D (2.5 percentile)	tau=9	0.3504215002429495,0.5853209610164802,1.0426954938937112,1.0010497291138216,2.2755708405872697,1.8645390026197126,4.371293513667138,5.167857604794195,5.620981652492923,10.498918401462932,9.9984962402602,17.784330670985273,18.010162361203786,34.1306041673899,33.82728410043134,46.54053813804749,70.14562586215627,78.60096898026053,97.57660798509993,156.0722806813233
D (97.5 percentile)	tau=9	0.8093255747466664,1.1054712851269892,3.145418438110443,1.690461438700343,8.146011613204854,3.801125340071459,9.375138818001826,8.825266351634683,10.929124623199945,20.757680338736034,23.0012602788362,27.168901696082898,35.58722753857674,52.54946855150347,74.47043159402655,69.29830912995412,97.25623476638609,115.36229198014891,165.22549622681265,236.3890363917546
speeds	tau=18	1.2432200017613064,1.8135457337067649,2.1599295267494476,2.4502898679749765,2.7887223323617705,3.1037971867671867,3.3563508826892234,3.691660408354333,3.992911006523728,4.4738329342460705,4.980772512166962,5.539110625257392,6.146159834240761,7.059656861545212,7.882106978602072,8.677247346266162,9.984334649741964,10.953739134984977,12.190139131238869,14.325963995158427
D (median)	tau=18	0.46287617258499536,0.8590950606590264,1.0454873744442195,1.3638938316851252,2.4744395100143795,3.1194203798521816,5.711058770758955,5.526771708062568,6.494424042420505,11.369439094739612,9.259809426596043,21.698833949707144,25.067330684814543,29.983098667593595,46.45644206894167,64.31414795452423,77.8559483833254,91.76087334577798,154.9247111420206,179.34535801025305
D (2.5 percentile)	tau=18	0.32160390249863235,0.505937033073315,0.7279812861392612,0.9254463282179807,1.6944473206352706,1.8784591457524205,3.3010595364227906,3.473217344109397,3.9926538298193077,6.774939624303214,6.2022509868433096,15.431600007747786,17.571266581645087,23.126416862446273,33.46311618698663,45.07440393226703,57.08854500032321,62.952570980050744,113.81333817217582,127.44597140203186
D (97.5 percentile)	tau=18	0.6325580523714495,1.377353142252642,1.4362971086866438,1.8789009816512712,3.3408731053432543,4.7840384094044275,8.689322464607837,8.308542543100144,10.377201375619709,16.806339700439548,12.841780882469859,29.33140472884403,35.45025926914478,38.89461345567103,61.074403398704725,101.10498178054719,103.34758933389271,131.0733480183789,196.2747940229985,235.48779969430973
speeds	tau=27	1.2961158812702052,1.8136853119389946,2.1317964130615814,2.404909912522492,2.700027297700935,3.0195768756771404,3.244605031229843,3.5678958072432896,3.82137145531586,4.198907427116098,4.753630513334007,5.257239522898965,5.852032404492947,6.589099154928035,7.508591843576337,8.274872775663026,9.519421524306237,10.634139555393245,11.849026833281131,14.127660506819597
D (median)	tau=27	0.7843000850614806,0.6874205538341763,1.1367506243069572,1.2721368070659227,2.236438873158438,3.72000643979301,4.017301370614469,5.833793140926909,5.183431371184286,7.268709416385442,11.029689849063825,14.888029459068463,24.10300202464918,28.667666254749737,39.215079772981134,43.53762373233068,70.321809491485,100.98441341425035,162.77282905727213,197.04898855446262
D (2.5 percentile)	tau=27	0.4432876688625251,0.44387071669161066,0.7592206185584602,0.7760980815764491,1.4080627123223668,2.0076182793154858,2.280262794118235,3.4640392246629363,3.4599946803766963,4.221277132042623,7.91384879315435,8.329239742423836,16.938493186902225,19.849792437715493,28.58123515344117,33.28501202762898,48.05598709322021,62.195690253391675,119.8084053449524,142.51314744319743
D (97.5 percentile)	tau=27	1.384866681797157,0.932473731528641,1.5438972055460132,1.9127857345723407,3.352718108334199,6.239033870882534,6.260524784032025,9.155110867329816,7.392337263334728,12.32731032653348,14.907028897036373,24.35947294703842,34.2343356066433,38.96074029389052,54.611917635124364,53.81689548422205,101.98278298258784,146.5129020679778,214.15803595569804,258.40911072726084
speeds	tau=36	1.2576017231912504,1.7929001452805362,2.1013931560519845,2.3592119684366892,2.617591956160651,2.940110863030918,3.167945140856442,3.454761899180654,3.740972089547937,4.058278456815446,4.558704514508153,5.053061110461555,5.617266448897746,6.228976337595013,7.031189485472941,7.83423239388985,8.659433075649131,10.053658935087508,11.447216889959842,13.941279924881524
D (median)	tau=36	0.6974286250354539,0.7490248797256741,1.261426386909245,1.2439713728693154,2.205951371186376,3.3948849582682685,2.9053278596928642,5.631032734411321,6.853718820871772,5.768603940412167,9.539224223674792,9.277731835984392,24.75992591050737,28.07895745704912,30.084757324992587,35.039916714098865,56.31574510968159,77.89145206120232,106.39266676803982,213.89709332548853
D (2.5 percentile)	tau=36	0.4938041819594136,0.507510938117868,0.8594592260270204,0.6981846649963074,1.2117167494854764,1.6938928555299941,1.5435003989047928,3.1836811658951154,3.8747834570391144,3.4641842978365025,5.976653589555992,4.978097876663465,15.517386141298113,15.803752545842114,21.46735472379006,23.881369917589534,39.32319575421155,52.10451405293698,68.20503261084515,143.9194635413538
D (97.5 percentile)	tau=36	0.9125267052179385,1.036617145755849,1.8185055922685491,1.9785447805882874,3.4402356104000464,6.2408329425577,4.799268749870966,8.318922218875228,11.502606157692554,9.749166889435536,14.185894795944806,14.09734615461639,37.69665733762941,45.28752038592975,39.76790593047608,51.48441975021104,79.56081117769418,118.66047899290548,157.50157889779058,296.0279184155837
speeds	tau=45	1.2579633383764095,1.7859488264604244,2.087023515721286,2.350060918848179,2.5932223580389695,2.90522333568827,3.1427059992164024,3.370793159104359,3.677662703791289,3.946175710539429,4.412015053276464,4.891775688598574,5.352995746544523,5.9108638099886415,6.6193386247400365,7.484427904338621,8.268763000878272,9.587787707864008,11.134350833067334,13.587187370691996
D (median)	tau=45	0.7725416623327079,0.7392050272140289,1.459574336831814,1.510869353072575,1.685748651453793,3.930477949806584,2.6675169929443316,5.8683548366302665,5.742596297357151,6.334639987227926,9.554986828969215,5.939055977859883,17.777656199016665,23.08451958568618,31.363490977470395,41.92680886897874,41.70712243407602,60.44552445455374,108.65500873526761,146.776045459075
D (2.5 percentile)	tau=45	0.5029340602351916,0.44097335093151663,0.9105936633923922,0.7908571458158611,0.9599562163844123,1.974731290936135,1.462945875868797,3.2809251124275747,2.9725867591419664,3.062995045131858,5.766162758449996,4.160718558252753,9.52180950127334,16.20699397128029,17.85797008299516,29.423878328793386,21.23671116394379,39.45168927824743,67.23748954254043,89.06847446754462
D (97.5 percentile)	tau=45	1.0834342694669843,1.0727687268048542,1.9449847734471095,2.6774042056081915,2.58333196048098,7.247359302116906,4.510601230268567,8.862394588518548,10.00299588869212,10.135078820511861,14.370060052013125,8.3823591831313,32.67261298597405,33.163001252567824,51.00464314315502,56.39688047854801,80.98627591085085,84.07255852732894,175.62924464109116,226.8463430552549
