# Supplementary material for: Heterogeneous T cell motility behaviors emerge from a coupling between speed and turning in vivo
Source: eLife. 2020 May 19;9:e53933. doi: 10.7554/eLife.53933 (PMC7237209; doi:10.7554/eLife.53933)
Supplement: Figure 6—source data 2. — Expression (Log10(CPM+1)) for marker genes for cells, and cluster labels. [file elife-53933-fig6-data2.txt]

index	ptprc log10(CPM+1)	trac log10(CPM+1)	tagapa log10(CPM+1)	lcp2a log10(CPM+1)	srgn log10(CPM+1)	arpc1b log10(CPM+1)	coro1a log10(CPM+1)	wasb log10(CPM+1)	capgb log10(CPM+1)	scinlb log10(CPM+1)	pde4ba log10(CPM+1)	junbb log10(CPM+1)	icn log10(CPM+1)	fa2h log10(CPM+1)	ccl38.1 log10(CPM+1)	id	cluster_assignment
lckgfp_s000	1.7767001950732895	3.3265181091116256	3.298038083521073	1.6312291117636253	0.6122252359197818	0.0	0.0	3.6504374049831796	0.0	0.0	1.5445892128351404	3.2031235318062743	0.0	0.0	0.6122252359197818	lckgfp_s000	0
lckgfp_s001	2.078159236290773	2.791057481965253	2.9783317560570683	2.6726356322788085	3.032019687583363	2.846787762096539	2.503726015225895	3.262999517266287	2.314102621958242	1.2270697597091644	1.1791236569635193	3.438733023240091	0.0	0.0	1.7455218966578485	lckgfp_s001	0
lckgfp_s003	3.240002255439847	3.3503647982068663	0.0	1.611563855536106	3.6655880889533923	2.9686888590498284	1.8212929913959992	0.0	0.8477687708560502	0.0	1.7797635494689976	2.030842353997811	0.0	0.0	0.0	lckgfp_s003	0
lckgfp_s004	0.5696166273678125	2.277584334466494	2.2713235588063956	0.8909899264221174	2.8004126969346586	2.9279690781796637	3.1273525234434847	2.0754565157319593	0.0	2.8947531235983206	2.7593683840132077	3.360090770198815	0.0	0.0	1.2701774458993955	lckgfp_s004	0
lckgfp_s005	0.0	2.756366202625748	1.0714672309363908	0.23533879214205425	3.0470401384553774	3.1095843830347447	1.8498317517142255	0.0	2.3183633233454946	0.0	0.0	3.59115015794022	0.0	0.0	0.0	lckgfp_s005	0
lckgfp_s006	1.8380159059405903	3.275457691281423	1.7855921651058382	0.9460046936967207	2.6455601870932113	3.237799357332432	2.635181238276285	2.6218487134491117	0.0	1.0584712962727314	3.3161730594420353	3.789304468986632	0.0	0.0	0.5575430686078717	lckgfp_s006	0
lckgfp_s007	2.7892086055728416	2.93672106192061	0.0	2.643095996845443	3.3269455212708694	3.5630445770021377	3.5924905402803344	1.4078818184727393	3.126976617679262	2.5915998937552587	2.5707814704656062	3.4289671982517165	0.0	0.0	0.0	lckgfp_s007	0
lckgfp_s008	1.6813450003626822	3.1027600651789604	3.169822307830824	0.9728924067941308	3.4021768430013855	2.2739881594638134	3.3697016462003018	2.9552321364985836	0.0	0.3261966813872005	2.835630306106989	3.162026221934285	0.0	0.0	2.3420814245556523	lckgfp_s008	0
lckgfp_s009	2.452924450733427	2.9370723510247676	2.95732540771514	3.178525370789241	0.9514446779033019	3.1981956492642016	0.866509742734415	1.0834699610891578	3.17207508018669	3.5814771696261634	3.269390633428472	2.779185654438162	0.0	0.0	0.0	lckgfp_s009	0
lckgfp_s012	2.2809738672671247	2.1913217134760794	1.1570798899522712	2.859613221654584	2.352394319903213	2.9428315088995265	3.129891813272982	3.2623319753617617	2.9719766663222797	0.0	2.9848471225987234	0.0	0.0	0.0	2.1289655247108614	lckgfp_s012	0
lckgfp_s013	2.018535075220006	0.0	2.7632912082870766	2.2719540779795278	3.6356303057787374	3.78747905866257	2.705406250910195	2.131517019477674	2.6281609830936095	3.7287643823097647	0.0	0.0	4.071675983224325	2.4928731015349244	2.67802381276315	lckgfp_s013	1
lckgfp_s014	2.6107339639609157	2.4726721856376046	3.204163009683376	2.983139561146509	2.5280835252215352	3.0109387803320637	2.975015002627173	0.0	2.918141747724507	0.0	3.400696132093087	3.538877131141672	0.0	0.20255964229563467	1.954914042349753	lckgfp_s014	0
lckgfp_s015	0.0	1.8223505131153055	0.0	0.0	1.1487747250527283	0.0	0.0	0.0	0.0	0.0	2.2950911942008254	1.8223505131153055	0.0	0.0	0.0	lckgfp_s015	1
lckgfp_s016	2.1629847010845022	1.2614674914517259	3.8281347064658906	0.0	3.5888172314317393	3.2421128846552065	2.7395411538086814	1.9819196014405305	1.1443858335388952	0.0	1.3932342313575703	1.7398343232714977	4.007532075558946	3.594097578953392	1.972040659985397	lckgfp_s016	1
lckgfp_s017	1.310514852015478	3.033817976901989	0.0	1.8267318052698793	3.093562422334519	2.943403536181871	0.0	3.003911342849709	1.4031548172939556	0.0	1.8139629113664721	0.8345783387910193	0.0	0.0	0.8345783387910193	lckgfp_s017	0
lckgfp_s018	2.5278020096533855	2.9366900601743504	0.0	1.6029851356031601	3.6290104255328255	3.3492662612633906	3.546164941139075	2.1406112001177626	0.0	0.0	0.0	0.2715075629746473	0.0	0.0	0.0	lckgfp_s018	0
lckgfp_s019	3.267454659727454	0.0	0.0	0.0	1.6810410270209106	3.18457442379232	0.0	3.599846495568311	2.1840513817214053	2.634505744233564	3.1145862419328116	0.0	1.8858548352834488	1.7695170871717456	0.0	lckgfp_s019	1
lckgfp_s022	2.834800360192212	1.2117085468993245	2.135134766428064	0.0	2.911169753149378	2.4552191906431533	2.2039383839642204	3.4736185979780303	2.60356566385534	1.0866026081083264	3.4020125557470204	2.090808911286845	0.0	0.0	0.0	lckgfp_s022	0
lckgfp_s023	2.0630910777277203	0.0	3.855298683118267	0.0	3.3622422107822487	3.3798565319265843	2.6731446675015746	3.42078717591132	0.0	3.46591208828249	0.0	0.0	3.8850861042942153	2.88355193042535	1.741132985342369	lckgfp_s023	1
lckgfp_s025	2.727239189232333	2.2176790226440146	3.340743874294717	3.4002854902950705	3.313972131613529	0.6696237974030437	3.449817339052403	1.384966739764201	3.2123797749746865	2.5332541062768437	3.2280713494920192	3.0839286370146906	0.0	0.0	0.0	lckgfp_s025	0
lckgfp_s026	2.8768972387977656	0.5711589413107091	3.397599033787857	2.6545158995223663	3.259124596256162	2.722354497395993	3.433067006527523	2.5637035670155397	2.861298888200172	2.953091155157595	3.0567089149814963	2.61901388377028	0.0	0.0	0.0	lckgfp_s026	0
lckgfp_s027	2.8543556584447884	2.9137151569031836	0.0	1.022060703176795	3.288540342192307	3.3424960325148425	2.2598343584986034	2.983459396900602	2.87689073409124	2.2598343584986034	2.9919664874608722	0.0	0.0	0.0	0.0	lckgfp_s027	0
lckgfp_s028	1.9496370778825758	0.0	0.0	0.0	1.6341611815150126	2.6946595588637945	2.350367507304169	1.221504173340262	2.98875903254444	1.8101796313604694	3.4524418548570552	0.0	0.0	0.0	0.29630104605833246	lckgfp_s028	0
lckgfp_s029	1.8111071794404283	3.2081739351600977	3.40783599676523	1.4863166755564816	3.4330135209087347	3.0063613522250114	2.821839629677996	1.2738153997486588	0.7361011948677629	2.2488794764140194	0.0	3.4848865030645793	0.0	0.0	1.9393280783851452	lckgfp_s029	0
lckgfp_s030	1.095412932806177	3.1469248966955634	2.3435901672031183	2.1532134818963793	3.145740763852579	2.6745358694199837	0.0	2.478264983338156	0.682956468207054	0.0	1.3786516710347934	3.3403021204451773	0.0	0.0	0.0	lckgfp_s030	0
lckgfp_s032	3.263267507612607	0.0	2.7342872311671886	1.9841647655874854	3.4942426486664075	2.8415169524960855	3.310014981537932	0.0	0.0	0.0	0.8351836231125039	3.386876492197727	0.0	0.0	0.0	lckgfp_s032	0
lckgfp_s033	0.43786151440059695	1.843591864297987	2.0009539878315494	0.850796302564708	3.374765355625471	3.0192908273319095	3.5143211263599787	0.7284958364340345	2.8188752885213666	2.804293408238059	1.7400601798386153	3.173489084354257	0.0	0.0	0.0	lckgfp_s033	0
lckgfp_s034	2.7916811385136526	2.716882873141674	4.426693149054168	1.8767572110269057	2.037678249881424	3.3688197589428324	3.5262619434961597	2.1893565725979798	2.8102340277294577	3.4017299141010637	0.0	2.8955036027354213	3.2546811624457117	2.2213406240559177	1.2916654525582134	lckgfp_s034	1
lckgfp_s035	1.9532207100075407	3.195296488412874	1.198604394368207	2.9733044536504742	2.6257747049541353	0.6581583587773728	2.8071702821825566	2.8271424544635706	2.5630356078130094	0.0	2.031595063451134	0.0	0.0	0.0	0.0	lckgfp_s035	0
lckgfp_s038	2.1161233641123514	3.310114364150068	2.422355605131456	0.0	2.281788430081182	3.296788064002571	3.2175369464920633	2.9696189157844888	0.0	0.4877698566671768	0.4877698566671768	3.013028745038527	0.0	0.0	1.0937567089965572	lckgfp_s038	0
lckgfp_s039	3.8895946069527527	0.7849567927371204	3.8264446096989713	2.6811577026626257	2.657470692856913	2.072542293124646	0.0	2.3990562153171737	2.2657878897743267	2.7723161751195	0.0	0.0	3.5093476409520266	2.838088692609615	1.5642320036538504	lckgfp_s039	1
lckgfp_s040	2.6054811522539447	2.4366891360331544	3.7104664890805394	2.365796406663283	1.8293003499610025	3.252121080107926	0.0	2.985348144335537	3.620288774410762	3.351438505189125	0.0	0.0	3.749629794156783	2.353784585869424	2.273769209817519	lckgfp_s040	1
lckgfp_s041	3.031675827131645	3.3206193352487445	2.091814992295238	2.9004245281344794	3.248911876492414	3.3734931799318892	3.3864832548287587	3.4029895413370306	2.858866255642239	3.0569649800130723	3.0400574100239135	3.758814394162808	0.0	0.0	0.0	lckgfp_s041	0
lckgfp_s042	2.824216193049475	3.1621921546362866	1.339492389630517	1.76703749940897	2.70748755383111	3.1184474877320447	3.0937200662852335	3.06159264774785	1.3164929021065215	2.4642482430350316	1.9756729547147853	3.6903054520065877	0.0	0.0	2.141483900801686	lckgfp_s042	0
lckgfp_s043	0.8311032042114461	0.0	3.657573744046196	2.760357293863676	3.3844317752603237	3.261704336511498	0.0	2.0029041300141315	2.742569168753628	0.0	3.0874450686134125	3.7647757520449807	0.0	0.0	2.1998955253257564	lckgfp_s043	0
lckgfp_s044	3.044710406045356	3.0155697203978926	2.277088452194819	2.38001839501003	3.162003198086676	2.982729809067644	2.99382425123596	3.1582687450299467	1.5062721453064474	0.4434444140879615	1.4686212924574487	2.7519951308417983	0.0	0.27602033427509465	1.6308319595007634	lckgfp_s044	0
lckgfp_s045	2.885576721278051	0.0	4.206567528520264	3.3746841904250604	2.8133915314539335	3.597770512867564	2.143416455855715	1.213454631657516	0.0	2.9788889977422968	0.0	3.016833908680182	3.475478072057382	2.0743230639058456	1.8906340245060544	lckgfp_s045	1
lckgfp_s046	1.5073973934952678	2.102617185923167	3.6711043687473275	2.349499890341623	3.708778291720928	0.0	2.9631577795303907	2.931889988109444	1.0926530246908521	1.3757759701257002	2.3092606707335355	3.9628491328679676	0.0	0.0	0.0	lckgfp_s046	0
lckgfp_s047	2.874779938380153	2.733349723591303	3.3402480506408336	2.0065884964687686	2.996933136220581	2.5593555551062916	2.6751946846177734	3.4479174990083106	0.7667661566483343	1.8949584248232791	2.6258200359898445	3.3516317872503114	0.0	0.0	0.4497532900404492	lckgfp_s047	0
lckgfp_s049	2.6825335696647246	2.858099838868905	3.989021836277909	0.0	3.0462302635477707	3.189787953225414	3.413817582734578	3.1331772115824466	3.393122897613317	3.5385272648786756	0.0	0.0	3.8265228332381076	3.0167516617256993	2.16063871297012	lckgfp_s049	1
lckgfp_s050	2.581128696775206	2.996759750075003	2.7078338155008224	2.1696899250036967	2.69188913340701	2.8480212086181687	3.5773332962269517	2.505937792580198	2.4802732810967343	2.346567447878592	2.888528451065156	2.6082118860588306	0.0	0.0	0.0	lckgfp_s050	0
lckgfp_s052	2.0452698870154724	0.0	2.9476802109713276	2.5032646886849195	2.5684835274238726	2.0989082640315284	3.206326195649176	2.4373088432368437	0.8883964823705875	0.0	2.17686448185589	2.5711085355332535	0.0	0.0	0.0	lckgfp_s052	0
lckgfp_s053	3.1402780892551214	0.0	3.335063764001046	2.5728037961186256	3.397733529248635	3.2017926147734492	1.696358828969095	3.331446302538806	3.097989130381927	1.3058626424224855	3.1179546161517067	3.3201433069018034	0.0	0.0	1.4039803557743673	lckgfp_s053	0
lckgfp_s054	2.3777123403004166	2.6450602053576704	0.6759702340421624	0.0	2.5026217391647427	2.4041345224487154	2.59437534720541	3.143969596081583	2.7492559304758704	1.890493361127379	2.7820053372978886	3.5034357157938536	0.0	1.2032608399120863	2.19654220632966	lckgfp_s054	0
lckgfp_s056	2.223233748952511	3.3638924647348705	3.9075637186266308	0.0	2.9606920320185535	3.571600805889326	3.225966200267327	0.0	2.2479130048019402	2.417810954734862	2.7098059689715246	0.0	0.0	0.0	0.0	lckgfp_s056	0
lckgfp_s057	0.0	3.31484552771802	2.145502519486551	0.0	3.302270687889306	3.0983372869700796	3.5944554164045925	2.571563538029497	0.0	3.2656086769675614	0.5585693425252704	3.8078740588742694	0.0	0.0	0.7950230453435708	lckgfp_s057	0
lckgfp_s058	0.0	0.0	1.9656195677904527	2.625806078932225	3.215709270133412	0.0	3.122812124294472	2.9025182060793795	0.0	0.7068916463295117	3.1546543868192023	2.9828431053091173	0.0	0.0	1.4514833079657525	lckgfp_s058	0
lckgfp_s060	0.0	0.0	3.2578603723405575	3.143479597202083	3.1577366844740986	3.653230400897944	3.161328376966197	3.5200078167287314	2.542354921579845	2.908672195445036	2.899328361683106	3.290936214614398	0.0	0.0	1.2612253890157112	lckgfp_s060	0
lckgfp_s061	2.9107765913927492	2.7569507209329274	3.186766916543388	0.0	2.929386304370238	0.0	2.461722318177356	2.010224200269239	2.9411793906139323	3.385356151178118	3.337377087872334	3.137141981920113	0.0	0.0	0.0	lckgfp_s061	0
lckgfp_s062	0.6345874742565586	3.161744953895328	0.0	1.153643406985798	3.5023793268046433	3.1996736971405877	2.9550223417358996	2.9783101585985974	2.529855674573722	0.88207963583965	1.0387505284529996	2.8860244635705037	0.0	0.0	0.0	lckgfp_s062	0
lckgfp_s063	0.9041227145922223	3.218715928495995	1.8650813153290222	2.552504736633513	0.3808999995693821	2.610771573589078	2.900287431400586	3.2749675120416306	3.3057346255023052	2.7175150832079544	2.4310893783325085	3.040077194464455	0.0	0.0	0.0	lckgfp_s063	0
lckgfp_s064	2.3295111730211806	1.5385916623286857	3.230818073440704	2.92813651084963	2.3140729509334874	3.624779400936663	2.4424005990550604	0.0	1.368738325545701	3.147095380880117	0.0	2.4424005990550604	3.2053371198198644	3.1971862464399883	2.246166648311251	lckgfp_s064	1
lckgfp_s065	3.1420645209275007	0.0	1.2333981080995857	2.5243621437065866	3.242776979140448	2.660108233012012	2.813308815732597	3.4442949107125247	2.079214714423392	2.827153817132593	3.236263866466759	3.696865927202975	0.0	0.0	1.8477087332476936	lckgfp_s065	0
lckgfp_s066	1.9985802263851156	2.1498974548213985	2.26189824084913	0.0	3.1011744458627857	3.5511808542360574	3.1570523518567053	2.576937382923294	1.2678180106780412	1.4308284768563881	2.5195361191339987	3.297303346312278	0.0	0.0	0.0	lckgfp_s066	0
lckgfp_s068	1.0578692694345535	0.0	0.0	2.838921600227382	2.74396870218141	2.6412974779179805	0.0	2.6001073533342587	3.278629024763141	0.489264842210139	3.234773217963274	3.661341573321268	0.0	0.0	0.0	lckgfp_s068	0
lckgfp_s070	2.3100516026535565	0.47883506017643324	3.683899351339501	2.525004722665896	3.5854259718537933	3.340425431551529	2.203949198335607	1.0437280196260268	2.9534167701835066	3.514584360578694	2.43552802078009	0.0	3.7403167842353136	2.962083744924139	2.085332386533124	lckgfp_s070	1
lckgfp_s071	0.0	3.106858808047466	0.0	2.5319598405898027	1.663450919850072	3.0025432533587773	3.5103218650210435	3.2292291895576994	1.7732770759370553	0.9520239638936788	0.0	3.2946812845577447	0.0	0.0	0.0	lckgfp_s071	0
lckgfp_s075	2.572823968830122	2.629586175727021	2.379656707191518	2.5980640927479555	2.272953765722648	3.2134009575222344	3.0744542176886647	3.167452739351094	0.0	1.9910901615235053	2.637121743327569	3.7918393010806186	0.0	0.0	2.106551425811039	lckgfp_s075	0
lckgfp_s076	2.913739579426005	3.4640702893600976	1.6182667180486225	2.0883582784521257	1.6241137750744024	3.0394395792828153	0.0	2.137339025325892	0.0	0.0	1.972482340265393	3.0933170505861742	2.0508917297668927	0.0	0.0	lckgfp_s076	0
lckgfp_s077	0.3355731335831571	2.546342658782308	2.8489108543897976	0.3355731335831571	0.0	3.0545894766610844	3.169953049947366	2.8912241436927184	2.052675301253701	1.4620052864767297	2.193184202863203	3.3422792513289816	2.496062922650804	0.0	0.90273410735448	lckgfp_s077	0
lckgfp_s078	2.7346682968886253	0.0	2.5475147460272023	0.7027362464996728	3.736854272834971	1.466939401385168	2.5084787416938674	1.8175441128540402	2.660790598039	1.9731353729669305	2.8182765250652304	3.577456935617489	0.0	0.0	0.0	lckgfp_s078	0
lckgfp_s079	0.0	0.0	2.215704442206403	0.0	3.740869630600683	3.006456596289956	1.8391775804631885	2.524338767180085	2.948387109084798	0.7432599325579196	2.040932624183439	4.319859913586575	0.0	0.0	0.0	lckgfp_s079	0
lckgfp_s080	1.9008842936503927	2.8050253311706133	2.851295731699766	3.004652934125339	3.215623381133278	2.159930370587957	1.1663900885535416	3.2893824053874745	0.43274182869981004	2.4383413101780036	2.731752313549789	2.6367596161062794	0.0	0.0	1.501804705968897	lckgfp_s080	0
lckgfp_s081	3.0007347917009772	0.0	3.5213943047738656	0.3115302613228633	3.5974340743399535	1.9650049714907083	3.2481130771477345	2.9547222123811556	0.0	0.0	3.301547953087797	3.6564327139371473	0.0	0.0	0.0	lckgfp_s081	0
lckgfp_s082	2.0625067872636267	0.0	3.818463448720154	3.101452188002782	3.452458087015834	2.9105219669409896	1.9092136052141688	0.0	0.0	1.9242689576094505	0.0	0.0	2.925532805322534	0.0	2.856947504805439	lckgfp_s082	1
lckgfp_s083	2.9202237365406196	2.449728818741093	3.5932282730047485	3.30758262715015	3.748455699245422	3.1540894431664865	2.8047442077653053	3.1606157643996897	3.074969107933516	3.67576698529137	1.3539049370423009	0.0	3.6187760457650953	3.573656231854668	2.902985887390092	lckgfp_s083	1
lckgfp_s084	0.0	3.221541878144837	0.4112349139006696	2.8188242482374837	0.0	2.4351544800508163	2.3901325788943457	3.3446631498329493	1.8069163172489224	2.1306739375896315	2.6731675805702126	2.040848849743593	0.0	0.0	0.0	lckgfp_s084	0
lckgfp_s086	2.398699889663516	2.991032682405318	3.174289352600618	2.285276468323952	2.230066080084874	3.492137309647615	3.622375183005044	0.0	2.1889290123284844	0.0	2.5537470604992647	3.6997461446336053	0.0	0.0	0.6846214000616396	lckgfp_s086	0
lckgfp_s087	3.6252209833921683	3.3961851701366093	2.809023224176939	0.0	3.4734361586109896	3.2298267495446873	2.052545877446483	3.559568803875766	1.718251347226845	3.1725521368310208	0.0	0.0	3.485515313192833	2.51489657994017	2.9890613436175375	lckgfp_s087	1
lckgfp_s088	3.075976434190629	3.038407920489223	2.8418598587832338	0.9759359667716314	3.3726896712774184	3.070804409794895	2.6097297718712964	2.9923207485727428	3.384471627841531	0.0	0.0	3.8105810302927816	0.0	0.0	0.0	lckgfp_s088	0
lckgfp_s089	2.7245636224949505	2.216210485721784	3.0136745783120995	0.0	3.4287478105250067	2.5231957357096793	0.0	0.0	2.787811354414159	3.3394356334588884	0.8157732931890664	0.0	3.373843300347817	2.9859847984803007	2.3081747726089743	lckgfp_s089	1
lckgfp_s090	2.9901985632824633	2.940917371028983	2.378692808611109	1.3588815801990923	3.0817456136941015	3.064915285455909	2.271197658166979	0.0	1.1495225206384483	0.0	2.9872770116558423	0.0	0.0	0.0	0.0	lckgfp_s090	0
lckgfp_s091	2.987612123885706	2.68411807882413	3.1214938231951948	0.0	2.9625072597359132	2.4518412978092154	0.0	0.0	0.0	0.5562310600712641	2.4954457326076134	3.573202144844497	0.0	0.0	0.0	lckgfp_s091	0
lckgfp_s092	2.3363492525899856	0.0	2.874229311588369	1.8414220138208834	3.451235963043841	0.0	0.0	3.339486132346975	0.0	2.8920305028380184	3.349685436964151	3.6059904849181414	0.0	0.0	0.0	lckgfp_s092	0
lckgfp_s093	3.280136043581783	3.398030809538374	3.7236065257979534	3.131023858422428	3.139673793584667	1.9195879694523739	0.0	3.0078828397292994	1.966114520229465	2.8703194803479875	1.2507895088393732	2.8309493924743796	0.0	0.0	1.0563646412213057	lckgfp_s093	0
lckgfp_s094	3.1706883104802857	3.0348030476525514	2.9286225128134924	2.7359347012625186	3.1549049007213004	1.8360734853480398	2.0516215682125147	2.440354537854343	0.0	0.0	2.4946629575361854	0.0	0.0	0.0	0.0	lckgfp_s094	0
lckgfp_s095	0.8669320102364386	1.8102942638695365	1.3028233019994857	3.2077670435963355	0.0	1.0228973775703971	3.0591714798328558	2.614136792894805	0.0	1.8102942638695365	1.7883715077197888	3.0121149114508627	0.0	0.0	1.0228973775703971	lckgfp_s095	0
lckgfp_s096	1.5107396947176623	0.0	3.6763787054224126	0.0	3.5441641615626853	0.0	0.0	1.921494691148056	0.0	1.2229053280482407	0.2970387822346147	3.302677823219557	1.7403130906896236	0.0	0.0	lckgfp_s096	0
lckgfp_s098	2.9763971746354754	0.0	0.6104925846643886	3.207652964290897	3.230261112053309	2.1446650080417187	0.0	3.411222691417228	0.0	1.4579701664007925	2.1510063653293603	0.0	0.0	0.0	1.7963558795295147	lckgfp_s098	0
lckgfp_s099	2.8327001719396656	0.9493329962765135	3.915066406818943	2.1312340439317468	2.404427643436011	3.278003137344147	3.190099365682476	1.6073923817865066	1.857871928190062	3.896748493979679	0.0	0.0	4.081722199695165	2.490034985462679	2.1792006620314246	lckgfp_s099	1
lckgfp_s101	0.0	3.164307455907365	2.1519524542679416	1.5383888411882525	3.5633538039193136	3.3607358282241444	2.421841017768183	2.282928812670093	2.8287514817937702	0.0	0.6746089774885959	3.915794733735458	0.0	0.0	0.0	lckgfp_s101	0
lckgfp_s102	0.0	0.0	2.6737616946388796	0.0	1.2954341844643213	0.505851251704851	0.0	3.294271174773078	0.0	0.0	0.32275370094612726	0.0	0.0	0.0	0.0	lckgfp_s102	0
lckgfp_s105	0.5781686299917091	1.4161920059073136	0.0	0.0	2.529036646279328	0.0	0.0	0.9711685008788643	2.1016278346602246	0.0	3.479737208362933	0.0	0.0	0.0	0.0	lckgfp_s105	0
lckgfp_s106	2.2395243393715214	0.0	3.7577929517520823	0.0	1.9036524864217719	2.66392659836686	3.6951108860504687	1.3536033613220915	2.7920041392330956	3.7821878313287063	0.9133498597400207	0.0	3.5678846186461364	1.7673781644726108	2.335933695403389	lckgfp_s106	1
lckgfp_s107	3.2800197007478307	0.0	4.16510612505461	0.0	3.415330038821696	3.099430745843919	3.377434451196833	2.024032647552483	0.0	3.452039313267488	0.0	0.0	3.594490903742491	0.95679508768311	2.5406814000717772	lckgfp_s107	1
lckgfp_s108	1.8527423099045954	3.0146264275270873	4.091991744401574	2.997152951665474	3.4399754683908164	2.9467972480409674	1.8241988215455847	3.0305076333775727	0.0	2.9204294686042824	0.0	0.0	3.2357356956990877	3.5417574497996087	2.6018417806050773	lckgfp_s108	1
lckgfp_s111	2.1708652819861607	0.0	3.6971081961259897	3.2310681158397765	2.015786045322761	2.7199763452541026	0.0	1.6240829161505992	1.7723044880938037	3.684995666724657	0.0	2.8317619784694026	3.01488335789747	0.0	1.9861218560379281	lckgfp_s111	1
lckgfp_s112	1.8401771515191938	1.9904102165092903	3.054685089851279	1.892165777290121	0.9395830648695394	2.4915736326229356	3.069184888769016	3.269585004326667	1.684017737011021	2.774588943432389	2.6083839639094633	3.4117759343367733	0.0	0.0	0.0	lckgfp_s112	0
lckgfp_s113	2.2537766132615342	0.0	1.7014165005829625	2.8319781604576546	2.743369119292418	3.096794474875845	0.0	0.0	2.568927018925818	0.8708804728097684	1.5541150092101867	3.2576756044913098	0.0	0.0	0.0	lckgfp_s113	0
lckgfp_s114	3.5012838885347284	0.0	3.990448076906774	1.6838364837615722	2.084875086759783	2.1690623986345474	2.8352511138561693	3.6995257730177316	3.3871549461561528	1.724410771452189	3.417639331328688	0.0	0.0	0.0	0.0	lckgfp_s114	0
lckgfp_s115	0.9214513686881504	0.0	3.5065127411280907	1.4413395179882382	3.5668417132740835	3.0075049329484735	0.45276291854672307	3.191096739705195	0.0	0.2828905166377736	0.8135216570745348	3.8024138957392233	0.0	1.2437158149470737	0.0	lckgfp_s115	0
lckgfp_s116	2.6044155853276214	2.792883113949664	3.2610792093678422	0.0	2.159897680586564	2.20633431339072	1.751640997007676	3.2859758371945174	2.8869051156986947	1.4328525114304758	2.4691487527677984	3.077274008503789	0.0	0.0	1.880908169979377	lckgfp_s116	0
lckgfp_s117	2.7696506613789023	2.8620709686000008	3.405712631325299	0.0	3.6916123806891346	3.351595259972694	3.0325564522368404	3.6753056438415577	3.1171528533780677	2.7629547656456155	0.0	0.0	3.635333775744529	3.2373182898148536	2.663907352117762	lckgfp_s117	1
lckgfp_s119	1.0259811272695436	0.4658732145613728	1.4749368081036065	0.0	3.1588299613341895	1.3816490177441592	1.4460115919132648	3.039555704333399	2.455831535263392	0.0	2.6073400077257767	0.0	0.0	0.0	0.0	lckgfp_s119	0
lckgfp_s120	3.3620229696191846	0.0	3.383659885680121	2.70706902856413	3.3172181008653148	3.135881854845212	0.0	3.264635223377877	2.323705512292534	3.3241425361180714	0.0	3.4506625186496174	4.146072605855111	3.0984889872906227	1.6872043167955384	lckgfp_s120	1
lckgfp_s121	2.4717258095012062	0.0	4.241929525138902	1.2294756946666343	3.224534203500929	1.5175111873748273	3.1353700785651273	2.98886149759332	1.5175111873748273	3.6910194495738553	2.380987212789054	0.0	2.915421077671522	3.4585094917987647	2.3354303792015125	lckgfp_s121	1
lckgfp_s124	1.1125265206439792	3.39766208726819	2.861310753776947	3.1846432729660803	3.6579152902932397	3.2750563926209937	2.8491132943092166	3.164216791164262	0.0	2.354963896134179	1.7235684237550553	4.146315443931172	0.0	0.0	0.0	lckgfp_s124	0
lckgfp_s125	2.9296766572777737	2.3817382544569954	2.8758142751828237	2.854998513719643	4.015077857023376	3.290571435798581	3.1694146724859027	3.047211277818947	2.867755223511948	0.0	2.84420413205702	0.0	0.0	0.0	0.0	lckgfp_s125	0
lckgfp_s126	0.0	0.6897720920468521	4.040049842045744	2.7871410643568253	3.7266994288533657	3.3158362781512003	0.0	1.4512725028910216	1.957080395043922	3.177407891340118	0.0	2.9748076792916875	3.2232489452812745	3.147143934112954	2.3169062936371896	lckgfp_s126	1
lckgfp_s127	1.144969870739448	1.3541953825731403	3.512503150185343	0.0	3.200514562327731	3.174941208207339	2.6278251945579663	0.0	0.0	2.5610489042327	0.7259855026332728	0.0	2.72629621369313	0.0	1.9625540225205336	lckgfp_s127	1
lckgfp_s128	1.7126461035202605	3.1550749261809314	3.1370630277622613	2.9954762756531155	3.446936565034175	3.5104609097714907	3.3710056687224528	2.251450496489446	2.2877837291902807	2.8917910258358965	0.4692529978750021	2.871820651046044	0.0	0.0	0.8138514862784367	lckgfp_s128	0
lckgfp_s131	3.708773680042863	3.4646169773091624	3.2281748264673795	0.0	2.1118123037252743	0.722534283331808	0.0	1.6818440932929315	0.0	3.3330905725874347	0.0	0.0	3.370286583207574	3.6640337522600253	2.2671433614751035	lckgfp_s131	1
lckgfp_s134	3.4083286203947387	3.0521785760467566	3.5703781647199575	3.694369717713498	2.832596492463154	3.195161455277359	2.5727979530273366	1.7162824292481793	2.737721351045529	3.0966862536943633	1.5602753675616543	0.0	3.6270353425859536	1.8048912734912035	2.728262983294809	lckgfp_s134	1
lckgfp_s135	2.318219808884329	0.0	3.7145520919381174	0.0	3.243429930519211	3.170025899950239	2.7652234226376873	2.4265302473542527	3.1184421903597017	3.2794168368679935	0.0	0.0	3.5774138360925716	2.756828165197329	2.3471560932187554	lckgfp_s135	1
lckgfp_s136	2.301386671498763	2.936195932248129	0.0	3.145989520856525	3.2239963275933334	2.8264889532528046	2.9962498679859855	3.1114371591840038	0.12668807593812195	0.0	3.364061088501231	3.361700943407399	0.0	0.0	0.0	lckgfp_s136	0
lckgfp_s138	0.0	0.0	1.7333419650888122	0.0	0.0	0.0	3.3275062895883543	0.0	0.0	0.0	0.0	0.0	0.0	0.0	1.7333419650888122	lckgfp_s138	1
lckgfp_s139	0.0	0.0	2.902769269201436	0.7724174633271198	3.6600535278221935	2.709225256190605	2.8606912004799994	0.0	2.723715524432888	1.0792016965533116	3.0721270056800716	3.7652691820393582	0.0	0.0	0.0	lckgfp_s139	0
lckgfp_s145	2.523789138530604	2.6541098058743295	3.6215141364860868	2.9767886171113203	0.0	3.49733691768388	3.101805457273216	2.0426895074173173	3.0300257235003496	0.0	2.150589621750817	3.3875175499050134	0.0	0.0	0.0	lckgfp_s145	0
lckgfp_s147	2.6817790154469887	0.0	3.5650087786691462	2.082421579312874	3.454630522152842	3.3773037692634027	0.0	2.892284679884382	2.866511489073825	3.3062727982829534	2.291891119817508	0.0	2.291891119817508	2.538710335548021	2.2573137784959014	lckgfp_s147	1
lckgfp_s148	3.1475453605545733	2.9572553221642983	0.0	0.0	0.0	0.0	3.532048885147927	0.0	3.6733308285553217	0.7769270894367261	0.0	0.0	0.0	0.0	0.0	lckgfp_s148	0
lckgfp_s150	2.5630029261018095	0.0	1.5722032924543476	0.0	3.1912206975720414	2.743779150462163	0.0	0.0	1.1780573777721377	0.6548515635372067	0.0	3.212334235739813	4.0505025090512055	2.925088522663123	0.0	lckgfp_s150	1
lckgfp_s151	3.459462845472368	0.0	1.670599344927778	0.0	2.7244575747588184	3.0147057184920354	2.9278431324701586	0.7132469287901209	0.0	3.4010434533737732	3.596752259596325	2.88285422350519	0.0	0.0	0.0	lckgfp_s151	0
lckgfp_s152	3.1808365555768745	2.2103494191521276	3.442951685913441	2.645897803119154	3.1082274351972923	3.41692329731411	2.136217202136541	1.5435754718429415	0.719748865122879	3.5007578073148617	0.0	0.0	3.300197338073924	2.4618926790334945	2.876432745517324	lckgfp_s152	1
lckgfp_s154	2.2115560295326175	2.69480394243018	2.7048750996287443	0.0	3.6686316995642483	3.6843274928911054	3.5768342743563384	3.1415659804236666	0.0	2.7071664171035996	3.414065789470151	3.136209886429628	0.0	0.0	0.0	lckgfp_s154	0
lckgfp_s156	1.4275035311949804	2.688390799664617	3.7957740942692633	2.4168130965041463	2.479752127969452	3.2575012603358515	2.7764539745678776	2.6824333403308733	2.9981327985410244	3.052886704633485	3.3987748137466087	3.495159951777547	0.0	0.0	1.413803708446703	lckgfp_s156	0
lckgfp_s157	2.478469523224093	2.108328063796147	3.2396058600449047	0.0	3.7543960190268533	2.5942746513668444	2.5734532371089385	3.11006668941236	2.3081654925093456	2.738631101825828	2.532176502576691	3.099446613575245	0.0	0.0	0.0	lckgfp_s157	0
lckgfp_s161	1.0668163624097153	2.8400891443024494	3.9513859125633464	3.578473672315907	1.9025870522483463	2.2995832127414424	3.105231369303685	2.6761853777324607	2.4607556796781123	3.054393921716105	0.0	0.0	2.8400891443024494	3.4654682378282495	1.4582483199640386	lckgfp_s161	1
lckgfp_s164	2.8756713254975814	2.864105080949391	3.6677006096464324	2.5184760039741323	0.504218119331412	3.0290019786823272	0.0	2.8562194963589005	3.154284489750585	0.7312891147186886	3.2813120356112657	0.0	0.0	0.0	0.0	lckgfp_s164	0
lckgfp_s165	3.0677201178326294	0.0	0.0	0.0	2.2834950355550765	3.3296636380310303	3.3708135535849437	3.5178492903233427	3.1820110688268466	3.3165179330903056	0.0	0.0	3.424059300993578	1.94919518588196	2.8442375716210164	lckgfp_s165	1
lckgfp_s167	2.0522533616602754	2.4882906078809435	3.2116106852509394	1.021753995151118	2.9461535185427903	1.7640413359810867	2.705523736261013	2.999971539706126	0.0	0.5287130486687952	2.6349739441009086	3.3059214031124142	0.0	0.0	0.0	lckgfp_s167	0
lckgfp_s169	2.859231836560394	3.0454514132261825	3.1693416397364893	2.9564589612669914	3.1686272359943417	3.1244487477053533	3.5138377523215643	2.8570396208949527	1.8573437558616834	0.0	3.165217676715194	0.0	0.0	0.0	1.1748628415857043	lckgfp_s169	0
lckgfp_s170	2.4568419756520465	2.6272213237272197	3.2692305966051505	0.0	3.074740778811782	3.448489479301169	3.662795963737836	2.8909489911291217	3.0209072755711137	2.7956024888403848	3.3979486474221994	3.2875142245956277	0.0	0.0	0.0	lckgfp_s170	0
lckgfp_s173	3.265492650183849	0.0	3.4757367136257047	0.0	1.9173951804774916	3.1415936587393056	0.0	2.973270326850049	3.7907024985393387	0.0	3.364850951252003	3.376186045263491	0.0	0.7062012424311067	1.3308143641549413	lckgfp_s173	0
lckgfp_s175	2.1720179780540496	2.7121129364537446	0.9976238839955174	3.3479958566130983	3.2186444577768665	0.0	3.0812220515163307	0.0	1.4207048907441604	3.2705933129072546	2.647186462778879	2.9635036633215672	0.0	0.0	0.0	lckgfp_s175	0
lckgfp_s180	2.3900175067577676	0.0	3.645252189444031	1.4695745960104658	2.2914469755050435	3.0093012658995466	2.881128889475451	2.452489308194762	0.0	3.833504427806135	0.5280935716287254	0.0	3.0858813928990494	2.624413269559061	2.2586219368966205	lckgfp_s180	1
lckgfp_s181	2.909788235351946	0.0	0.0	0.0	0.0	0.0	0.0	0.0	0.11784458879348664	0.0	1.0980905695843695	0.0	0.0	0.0	0.0	lckgfp_s181	0
lckgfp_s183	1.2604387300358406	3.175250897923441	3.405790193798866	0.0	0.0	2.9771137118335584	0.0	0.0	0.0	2.1766703365753624	3.4076045719467634	3.4696648215674575	0.0	2.2604806684201035	0.0	lckgfp_s183	0
lckgfp_s184	0.0	3.3274033450866605	3.961731457861012	2.3944552060684896	3.195751021634232	1.624972726365905	2.732625103587765	0.9653616705197148	2.644917844443612	4.006761152553905	1.9991340453358886	0.0	3.2765917054222293	2.7884429596252476	2.364617048482316	lckgfp_s184	1
lckgfp_s187	2.369033184379359	0.0	3.525402174415522	2.8506780912232768	3.408008066194243	0.0	3.2361457605495585	3.048287741167695	0.0	2.864529231729263	3.3012288298718864	3.4691405500295533	0.0	0.0	0.6897239058715714	lckgfp_s187	0
lckgfp_s193	0.0	2.0784482047537587	3.304697216716326	0.0	3.2863579560888954	2.581372025680907	0.0	2.256227895551087	2.7520397773899137	0.0	2.6148885513126103	3.7651231890207044	2.5375585965409893	0.0	0.0	lckgfp_s193	0
lckgfp_s195	3.4982454592995222	0.350355556196228	3.18061821357957	0.0	3.470704629299484	3.268491225075428	2.866528585024246	0.0	3.5085568846281876	3.1788373027250674	0.0	0.0	3.741957013876906	3.0606048070396334	2.924080186250129	lckgfp_s195	1
lckgfp_s199	0.0	2.689060776267758	2.81897867784253	2.8740120340092603	3.1772711166991052	3.4734752152664723	3.3579215527812383	3.0753058550100416	0.9867789084151666	0.0	2.5887211717782255	3.1860481324198076	0.0	0.0	0.17948690971965015	lckgfp_s199	0
lckgfp_s200	2.886654272427696	2.5810883058308036	0.9032332802725924	3.4873020820356118	2.697392773876818	3.3165534319437477	1.46255611192435	3.1879662923602106	3.507749748774241	0.0	3.8076311100676983	2.880405320069025	0.0	0.0	0.0	lckgfp_s200	0
lckgfp_s203	2.9491823560468524	2.9100948444705224	3.7758397990272914	2.2336553105449597	3.1154925786694863	3.222283683625575	3.2199169397430016	2.445693459993207	0.0	0.0	3.426306036861511	3.5441791758282837	0.0	0.0	0.8478640395749497	lckgfp_s203	0
lckgfp_s204	2.8693510119204957	0.0	0.0	1.9026473286647427	2.308687077601515	3.2113131046385828	2.2420957295669792	3.1911893110249374	0.0	3.8010607039717215	0.0	0.0	2.7197394665163803	2.6689625629678915	2.0672462302030516	lckgfp_s204	1
lckgfp_s208	3.165342673963602	2.417815953404003	3.7919701545961444	3.234152293029028	3.681918920689816	2.7334984184749582	2.3310343914291702	2.7502814528980597	2.78708998765414	3.334480097275792	0.0	0.0	3.6223465153469667	2.1970721077467226	2.170097809054671	lckgfp_s208	1
lckgfp_s211	3.021334454016453	2.8259907777463837	3.92066455424985	2.5645950054546502	2.9847659891319047	2.7581035705386316	0.0	0.0	3.2861159984580004	3.51746459787869	0.0	0.0	3.8065978468132395	3.4388209352598333	2.5923704150921547	lckgfp_s211	1
lckgfp_s215	2.76738160325839	0.0	3.7134085034024844	3.3295967740183143	3.6971937189339883	0.4961605681724706	3.1679567216790883	0.31538715844109466	0.0	2.8616805656292073	3.17343167139533	3.9933124031073377	0.0	0.0	2.8723820929174226	lckgfp_s215	0
lckgfp_s216	2.2989568490183525	0.0	2.2922575566295516	2.997510741023037	1.4536541654434452	1.8517374347324447	3.0014850559911697	2.158976154540216	2.880627538931687	3.12763263414562	2.38328375218709	0.0	3.7176966943624783	2.377774298917153	1.696794547963806	lckgfp_s216	1
lckgfp_s217	1.7924075707331886	0.0	3.5049511763816765	0.0	3.725362766217851	3.5813398880702754	3.3438512629322834	0.0	3.76352524300613	3.5790180627631694	0.0	0.0	3.839127405948037	2.7561448680981657	2.6893249676930804	lckgfp_s217	1
lckgfp_s220	2.594416599620238	0.0	0.0	0.0	0.0	2.9673592860941285	2.1570133874830546	2.8535563690142363	0.0	0.0	2.9386196103619664	0.0	2.3073903508479314	0.0	0.0	lckgfp_s220	1
lckgfp_s224	0.0	2.727139779361793	3.6002850253976537	0.1712050784735263	2.784193072371954	0.3891049125689184	3.1299140276430224	2.557504365020644	0.0	2.401039001400726	3.003055572316639	3.5729443475054894	0.0	0.0	0.0	lckgfp_s224	0
lckgfp_s226	2.3805608230990414	3.001508190327902	2.944894609239121	2.974649639511536	3.4713570433127305	2.839576308277779	3.645719720927474	2.898147481663683	3.2766757936246664	0.0	3.2047231500035482	2.9639986530597833	0.0	0.0	0.0	lckgfp_s226	0
lckgfp_s227	3.6188485921088076	1.4219817096232963	3.2785818562763263	0.0	3.0113138146065634	2.421116836580544	3.1562949542570427	2.092993172800357	0.0	3.3094332302336302	0.0	0.0	3.8213773942553853	3.5756034900769706	2.421116836580544	lckgfp_s227	1
lckgfp_s229	1.0036698478103934	2.738467965792572	3.3305120647418365	3.229059310214454	3.359190049268263	0.0	0.0	0.24478946331963825	1.4953065158905083	3.5733314406062564	1.7946469634561852	0.24478946331963825	0.0	0.0	1.622026036447029	lckgfp_s229	1
lckgfp_s231	0.5064572541817861	0.0	3.951075226832353	2.612555709708106	2.5550494368438534	3.4808698671499236	1.1540549935154352	2.3286366381113996	2.5217224593187466	2.633136541942108	0.0	2.6241096915877242	3.679068582820804	3.005617277750065	1.7326472256111691	lckgfp_s231	1
lckgfp_s234	3.2081738773249397	0.0	3.716445967578592	2.9730300073697435	3.235189140850393	2.5920965764913215	3.1494233069832163	2.596461239239277	2.7045155021424137	2.9097938243226453	2.949599925466129	2.979819441019756	0.0	0.0	0.0	lckgfp_s234	0
lckgfp_s235	3.1414841556956308	0.0	0.6427044158449939	0.0	0.0	0.0	0.0	0.0	0.0	0.0	2.442350062806683	4.026742537687292	0.0	0.0	0.0	lckgfp_s235	0
lckgfp_s236	3.330076215328619	2.344947415278544	3.0352506293310584	1.4880982678772163	2.5683452785342826	2.1925485869392323	2.9245147773839064	2.3786584608598984	3.093192518858604	3.1330332910061633	0.0	0.0	3.5199845909819514	2.2954974596611772	0.8422088205586086	lckgfp_s236	1
lckgfp_s237	2.929105251112838	3.044780924933779	2.8308146805055885	0.0	2.6742415965779287	3.6348429262578152	2.9928689092411305	3.206981584136484	0.0	3.1828088426071517	0.0	0.0	3.484367814299643	3.7514922629518024	1.6134473575090684	lckgfp_s237	1
lckgfp_s241	1.437545744447784	0.0	3.566601942612725	1.7479792454208578	3.3577604560443364	3.3664719020345526	2.7931590125553445	2.0364182711395746	0.0	3.5518470152884434	0.0	0.0	3.1411746298700085	3.3419732464533345	2.4441453114203306	lckgfp_s241	1
lckgfp_s246	0.0	3.1742700610873267	3.7402056511977633	1.8578271080243596	0.0	2.960575222137302	0.0	1.8205859294956024	0.0	2.3655191537039526	1.684737949922284	3.803651218114865	0.0	0.0	1.4859700010567054	lckgfp_s246	0
lckgfp_s247	2.3604340394585943	0.4326644555861443	1.3087447010333892	2.0873376467711164	3.7151843630561676	3.1520714842596065	0.0	3.0154048958238753	3.3201472123766	2.523849445113354	2.6997540597190848	3.29631601081256	0.0	0.0	0.0	lckgfp_s247	0
lckgfp_s248	1.7656228688053441	2.9746796473114263	3.416782756689191	2.679293484336339	3.038922496735658	0.0	3.48389012075586	3.1887467316651494	0.0	2.5299371118518987	2.8802132344940854	2.7889588885919485	0.0	0.0	0.341161840091299	lckgfp_s248	0
lckgfp_s252	1.9224181523026538	1.991121669195571	3.7395617980610973	0.0	2.85240648186203	0.0	0.0	2.8812644246203174	1.947925752377501	2.536826361819234	3.144552713767626	3.6398104353004532	0.0	0.0	0.0	lckgfp_s252	0
lckgfp_s254	2.9512197015276724	2.8264429079941977	3.817508814996981	0.0	3.002318229528091	3.137360585764388	2.2464076779010265	2.935443431001763	2.650675354040929	3.2402218352301184	0.0	2.927335048146546	3.7211419661798124	2.87522257096603	2.7596040468750935	lckgfp_s254	1
lckgfp_s256	0.7912571844667594	2.9805122846514824	3.3177328600564238	3.0155563280998554	3.4052387830025164	2.9685766224578023	3.2231031532918593	0.0	2.706730445198641	1.64114236843396	3.098811745721398	3.2833716088686957	0.0	0.0	0.0	lckgfp_s256	0
lckgfp_s261	3.434869970425439	1.8715069989840332	3.7919131411927958	0.0	3.418463172174869	2.648361636823797	2.225204066645431	2.8955657096023115	2.398845172191335	2.8485164510679253	2.5806815988000076	0.0	3.7366976778473764	3.1475399823646395	1.6354687215645778	lckgfp_s261	1
lckgfp_s269	0.23398411095663896	3.203183730673215	3.7516129226279107	0.38521097585919617	3.3387022814523606	3.0667268533253984	3.263127764751358	2.9986441768269536	0.0	2.974668652696422	3.826595629786031	3.2206918318142352	0.0	0.0	0.4971624734531404	lckgfp_s269	0
lckgfp_s270	1.9852237734078282	0.0	3.57166834456041	0.6790507158260343	3.2571370306267893	2.875354346580854	0.0	1.2069176255786171	0.0	0.0	0.0	3.303957731856743	0.0	0.0	0.0	lckgfp_s270	0
lckgfp_s271	2.3215123801529853	3.119182474970851	3.5850923619659225	0.0	0.966358599507727	2.946347004241723	3.221233170044664	0.5742095883181236	3.1962348410169983	3.3216429419467937	3.3410505627734803	3.1678187474932695	0.0	0.0	0.0	lckgfp_s271	0
lckgfp_s276	3.7167064903147677	1.3087449361600991	3.8028130549831722	3.7060855827727806	2.9775245019897016	3.0725682748541097	2.518637407326906	2.192756084945689	2.3101914845169635	0.0	0.0	0.0	3.4189756500659243	3.1228887760726423	2.4644551322242005	lckgfp_s276	1
lckgfp_s277	2.4411031289513354	2.9387976351262575	3.6955304327649117	2.141643119912224	3.366056883901643	3.158607371905848	3.065213798853639	0.4524236971949263	0.0	3.1890294010350053	3.256230514781236	3.1597116815129294	3.26842148502503	3.4826394801590483	2.44683476224443	lckgfp_s277	1
lckgfp_s279	2.1193601368975425	2.597455670980712	3.661169742939519	3.197500084733256	2.89475321566898	0.0	3.478233332043953	3.027569441385324	0.0	2.9441543967260713	2.867559368272793	3.4764580928993487	0.0	0.0	0.6635697259735697	lckgfp_s279	0
lckgfp_s283	0.0	1.4367816721097337	3.9197875301414724	2.1228535771776835	3.385036916773803	0.0	3.1604708742205325	1.6606397192123068	0.0	3.1549016925452005	0.0	0.0	3.2061983504656544	3.0985515088192557	2.357009813679957	lckgfp_s283	1
lckgfp_s288	0.0	1.4542450067999846	3.7361532833433677	3.233895964385254	3.372014462690305	2.7668135519001944	3.1601098173621964	3.121717562139827	3.4728290006601794	0.0	3.5986882928628106	2.8083494396439974	0.0	0.0	1.4728861997157896	lckgfp_s288	0
lckgfp_s291	3.3119921594007082	0.0	0.0	3.0345776339706356	2.8675081629732837	1.5708593348320876	0.0	0.0	0.0	3.3772617800858034	3.613787265434049	2.9744678868252183	0.0	0.0	0.0	lckgfp_s291	0
lckgfp_s292	3.068294090408897	2.6508714089324164	3.605721132509787	0.0	1.050265281358224	3.4956101469235326	3.5956967365602313	2.507109731671046	2.5162249631190936	3.325225830585395	0.0	3.1663933365581687	3.2587797447109903	3.0745738823924302	2.0678384976403845	lckgfp_s292	1
lckgfp_s293	2.5984390870268395	3.351657021949643	3.5276555638622127	2.948029028315373	3.1490253044818934	3.7311183733680586	3.4454107638903375	3.1380621092618766	1.3525415344378915	3.302940557037364	3.037468348009656	3.2900281608771023	0.0	0.0	1.288797245939369	lckgfp_s293	0
lckgfp_s294	3.448249359584044	2.72104396802411	3.755407538330501	2.199504447283778	2.2490532472471063	3.499969020926779	3.204874988708721	2.8819740011189947	2.8223295863386126	3.352199407777012	1.7819144521051467	3.315397081885093	0.0	0.0	0.0	lckgfp_s294	0
lckgfp_s295	1.4353416674261141	2.4727916743421714	2.706887535561708	0.2378259817964664	1.1926362297480062	2.8152890661037135	3.068917287874032	1.8687169371700856	2.665828758708463	0.0	0.7856048218547337	2.135504578225663	3.0933448411869975	2.9587968420356616	1.9609998781313023	lckgfp_s295	1
lckgfp_s299	2.929568360857392	0.0	3.3987106446133466	2.598068451277048	2.791359355933554	0.14084789108521462	1.2788644069791233	0.9376000074229331	0.0	2.741536586081086	3.09951095041332	3.2846532248804268	0.0	0.0	0.0	lckgfp_s299	0
lckgfp_s302	3.513383663051795	0.0	3.8654921925074146	3.0212262372558025	1.8166345869626854	3.162440491906238	0.0	0.0	2.114339663182203	2.9487507597097484	2.9074069408134187	0.0	2.764948414207356	3.1273012719783106	2.35594491684843	lckgfp_s302	1
lckgfp_s306	2.962832884736563	0.9403429210890765	0.9403429210890765	2.8454892032851347	2.380594680018183	2.2989779749452968	2.2258032056184844	3.1034892603643414	0.0	0.9403429210890765	3.83793032115958	0.0	0.0	0.0	1.5683238611068324	lckgfp_s306	0
lckgfp_s307	3.0778018579095896	0.0	3.1092248789821197	3.174296030429354	3.0010874070758398	3.2320799077535294	0.0	0.0	1.4675272660031438	2.0759199249245293	1.2987735910499651	0.0	3.410085980778549	2.8481209446106446	1.6834153610394438	lckgfp_s307	1
lckgfp_s312	0.9396395254944963	2.8236669699370056	3.7182595608100284	3.046884489684428	3.4922061927911634	3.3111077810573954	3.3840812895379084	3.246708247397941	3.2031312748296363	3.2395416614687873	3.1656768742020596	3.745767813746777	0.0	0.0	0.0	lckgfp_s312	0
lckgfp_s318	2.229795419666725	0.0	3.0420762043278238	2.255582808402509	3.217353069696529	2.6167639627430628	2.9650153116856557	2.8006101385912037	2.1079127757815357	3.662874090839936	2.934649082319379	0.0	2.901998926863298	1.337829298532547	0.0	lckgfp_s318	1
lckgfp_s325	0.0	1.0424813729872993	3.424606683334668	2.578302895621428	1.287442291575085	3.501021524215694	2.4962751659191524	3.437518668954328	2.903923834757962	2.9854233456038295	3.173215411402629	0.0	3.1445236770132983	2.0957753662910354	0.0	lckgfp_s325	1
lckgfp_s326	2.9138041660711393	3.359187632247112	2.8598861821191575	2.7381905114823897	3.151345707378353	3.5410346015161256	3.4595602168967328	2.834046713584834	0.0	2.3682881904374784	0.0	3.755574589353247	0.0	0.0	0.0	lckgfp_s326	0
lckgfp_s327	2.9256423367624764	3.203657148259053	2.9259499816457994	2.4734432261228374	3.112656298907289	3.605247871026837	3.62852170477026	2.6657411828585342	3.1951370392756777	2.433284496638325	3.505604946436701	3.016903902807068	0.0	0.0	0.0	lckgfp_s327	0
lckgfp_s333	3.4651140503377045	1.5517602284929441	3.3903204347657914	0.8306468199476743	2.8570174376646165	2.5442415368649622	3.261169210606785	2.0551208811551276	2.631491543675892	3.598310307804879	0.0	3.028822368226961	3.8681734219299853	2.6543023929996012	1.0983603246837916	lckgfp_s333	1
lckgfp_s334	2.2310476265010117	0.0	0.0	1.6192633030038008	2.7451444765377553	3.0562399344462987	2.175878044035629	2.5950816616216064	2.864566325261874	2.9740250483390884	0.0	0.0	3.1944385627501886	2.9102644894699132	1.3285455866162572	lckgfp_s334	1
lckgfp_s337	2.1122041780929193	2.5437361565356933	3.6896878763062895	2.966638747237295	3.189332004893676	3.3131682230379926	3.546710938527172	0.0	1.7762209941781564	3.332127037996443	3.077016216658961	2.879210135778581	0.0	0.0	1.8265649328239093	lckgfp_s337	0
lckgfp_s344	0.6814849976028687	2.549800729694502	3.0684489382769184	0.0	3.3794754385559034	3.3860426926879397	3.4601403692026027	3.1085749194372374	2.608918727417056	2.71764487758474	3.5226268059133496	2.8355158941362895	0.0	0.0	0.0	lckgfp_s344	0
lckgfp_s345	2.3960562649973536	3.122455131411862	4.004394482536189	3.0384180747196923	3.3879800467323506	3.3364509482439635	2.805765020581313	0.0	1.4728484489309304	0.0	3.0281836739399615	3.5699825211941048	0.0	0.0	0.0	lckgfp_s345	0
lckgfp_s346	0.7606716336790298	2.7141776763561642	3.215677088732738	0.0	3.62642405552309	0.0	0.0	3.3413360080836485	3.140994667999753	0.0	2.957141631883792	0.0	0.0	0.0	0.0	lckgfp_s346	0
lckgfp_s347	3.33497281737513	3.112027808997892	2.800127267470739	0.0	0.0	3.5317583409776185	2.6984467323853196	0.0	0.769334502524194	2.7768087239562247	3.2135552271602474	0.0	0.0	0.0	0.0	lckgfp_s347	0
lckgfp_s349	3.0854555499630107	1.4818859514306923	3.0534677028109156	2.5995988695739225	1.172999856438487	2.745655728017249	3.3915094971473487	0.0	2.8547606494928663	3.5869721965850494	1.6302327298493189	3.136323595835742	3.2843162328075644	2.794575033095776	1.4591996017098883	lckgfp_s349	1
lckgfp_s353	2.706786875425929	3.083320582720734	3.268409103634715	3.492648139412789	0.8758630282592915	3.1173659728872662	1.5910368729267566	2.9510452930962345	2.9588902217237965	2.654698054892141	3.204750233654835	3.300722266849502	0.0	0.0	0.0	lckgfp_s353	0
lckgfp_s355	3.306585643045614	3.1798327348001334	3.5995138913901177	2.8497964226045944	3.314048553389869	3.201537982021249	2.8830582922264862	1.8005533690106001	1.9957181877019585	0.0	3.3253083496714733	3.978561423586395	0.0	0.0	0.593943428765033	lckgfp_s355	0
lckgfp_s356	0.0	2.448766345093359	3.010883404656115	0.0	2.9138860945043477	3.20635592365845	2.996148107893272	2.563869572900184	0.0	0.0	2.731370599979173	3.579965536756326	0.0	0.0	0.0	lckgfp_s356	0
lckgfp_s357	2.446917212100558	2.503904235540665	3.296339562920622	2.5173302488994658	3.109568353870227	3.3235099736312486	3.106458221779137	2.9193799729439442	2.8519865564647295	2.8757931563284904	3.301078300151222	3.0814431641920947	0.0	0.0	1.8239696441870552	lckgfp_s357	0
lckgfp_s358	2.699301373142511	3.001171376662325	3.0416369289607768	1.2701017525854545	3.5580089492027343	3.166959817424998	0.0	1.4061907743317605	3.3070469599249304	3.081832968053461	3.3584086372095054	3.609540162968396	0.0	0.0	2.1212645682420117	lckgfp_s358	0
lckgfp_s359	2.582599390917812	2.586591715868558	3.1669055017825767	1.5807828508543074	2.536076117994805	3.473496748312684	3.308297578390329	2.8182121434234517	3.3328577962426214	3.21528899557134	3.1888013612990935	3.27783749966196	0.0	0.0	0.0	lckgfp_s359	0
lckgfp_s362	3.5393199524126358	0.0	3.230944608777185	3.158987960250341	1.7785886982614008	0.0	1.1076200899383852	0.0	0.0	2.0306354961150843	3.904250785318424	0.0	2.7358832440667733	0.0	2.154561265929862	lckgfp_s362	1
lckgfp_s363	2.724880202255115	0.0	3.5198296024510936	1.4124267953518348	2.919063063072054	2.87268704211651	3.186173810419668	3.0278759606683057	0.0	3.018516701869681	2.4391061425690945	3.015646988950608	0.0	0.0	0.18431677160462023	lckgfp_s363	0
lckgfp_s364	2.859395106733958	2.860988990385124	3.556090472122762	2.862577045782717	3.2315708032772394	2.8068383063439746	2.9828238488867043	2.861624909545923	2.772342841673104	2.341718199939259	3.1594851968151327	3.648873173816941	0.18525284821138055	0.0	0.4952551522730272	lckgfp_s364	0
lckgfp_s365	0.9660941895299033	0.0	1.7689554719650422	0.0	3.7738062549738225	1.5314271785941964	2.749683104050033	1.4107259972738124	2.607669848692048	3.224155953502132	3.9687564132647255	0.0	0.0	0.0	0.0	lckgfp_s365	0
lckgfp_s367	2.7524023240324906	3.1421543404343466	3.814613799254262	2.352421890280432	3.313787288076082	2.037074054140067	0.0	2.3833230599056168	0.0	3.6418576949623485	0.0	3.0267432144548096	3.690800692798016	2.987757497491222	1.8287058074412754	lckgfp_s367	1
lckgfp_s368	2.394035909724115	0.0	3.2881857068589477	3.2093736971606903	3.7396312041412254	3.5484523973793753	2.584566340241954	1.0476959754441506	1.3842588355407632	3.4781551202131986	1.0476959754441506	1.5881615928409563	3.0864659008010418	3.303496321351199	2.0632285231385357	lckgfp_s368	1
lckgfp_s370	2.2999672073229984	2.067436076632456	2.0011085673624094	3.349131887190122	3.386099585367381	1.654307412358243	0.0	2.046432654409632	1.4559253699376724	2.824918226454033	3.521209741048545	0.0	0.0	0.0	0.0	lckgfp_s370	0
lckgfp_s371	2.828354353075538	2.9386760377069012	3.7829783847491316	2.253782289240486	3.5007602529422446	3.327608833675973	3.3516409084355603	2.860823411323632	2.882363818559167	2.42906578412325	2.836215392655938	3.0466252255556023	0.0	0.0	0.0	lckgfp_s371	0
lckgfp_s372	2.6996804669412375	3.3629419643343943	0.0	1.952523662877705	3.2261356995314667	3.3625566060296426	0.0	2.177051126773753	0.0	0.0	2.6250246591712485	0.0	0.0	0.0	0.8535112617736516	lckgfp_s372	0
lckgfp_s373	2.589983543432648	1.3014878958227358	3.9768594300834157	0.0	3.5812472233910895	2.638170696474272	3.0606503793465554	3.1580592921867607	3.3348148607549217	2.898877424035486	0.0	0.0	3.5539765089797184	0.0	2.3381386640349615	lckgfp_s373	1
lckgfp_s378	3.161902821210449	0.0	0.0	0.0	2.914154227437537	3.265932261657509	3.288726455139215	2.758201605665426	3.1666460046485847	0.0	0.0	0.0	4.16309077250723	1.8533056542981763	1.4045424396175497	lckgfp_s378	1
lckgfp_s385	0.846498480929619	0.0	3.0897681671237014	0.7244285408027826	3.371987167281731	0.0	2.960058970755856	2.5753293089782407	0.0	3.1745270121432294	3.242431243992838	3.5853012744131374	0.0	0.0	0.0	lckgfp_s385	0
lckgfp_s387	2.7693829523791553	2.5371624764824054	3.4600670213681495	2.7118310869061424	3.112201523273127	3.3905299659612855	2.3359890842560973	2.9673233446389427	2.098784910372268	2.114945504222115	3.362597116446722	2.326347006843005	0.0	0.0	1.9685642442742002	lckgfp_s387	0
lckgfp_s391	1.053932772298229	2.90107936112125	0.0	3.16446280003845	3.1742907356681425	3.3843169665523356	3.3912224207316415	2.4602186949804783	2.976444590342691	0.0	3.3610611494248106	2.9405171605979743	0.0	0.0	1.1071033543490651	lckgfp_s391	0
lckgfp_s393	2.221514186293532	2.755147289520078	3.0408165692363314	2.9207632875074436	2.974085030102775	3.1990831556327404	2.970937506194252	2.831886933720163	1.30696108085659	0.0	2.8390788094085635	3.443336168321174	0.0	0.0	1.558090857035982	lckgfp_s393	0
lckgfp_s395	2.6871375478444213	2.945958087983848	3.396860836243785	2.3744138388950007	3.1552848256289354	2.91324891056311	3.5796861694925233	2.6580067743886078	2.474351698426088	2.777353988849876	3.030729161393354	3.425787217100351	0.0	0.2852006033630423	0.0	lckgfp_s395	0
lckgfp_s398	0.0	0.0	1.4210108584063363	0.0	0.0	0.0	0.0	0.0	0.0	0.0	0.0	0.0	0.0	0.0	0.0	lckgfp_s398	1
lckgfp_s399	1.5211732745827593	3.128287781090893	3.4187257426022106	1.7446638467280493	3.0882634970955256	3.018689203209299	3.2159003347256947	3.088496360076584	2.6537172264496496	3.05537088935504	1.5542647631996083	3.3430676615928987	0.0	0.0	1.2412959926073248	lckgfp_s399	0
lckgfp_s401	0.727400140237448	0.0	3.4456827246112205	3.003027522227393	0.0	0.0	0.0	2.879546721757267	2.9788769089175364	3.2225354236532406	3.652073385833356	0.0	0.0	0.0	0.0	lckgfp_s401	0
lckgfp_s403	1.4214160424248874	2.944745634416664	1.2385787495370941	3.1815218817499673	3.4782393406425287	0.0	0.0	2.7751137582570276	2.760324469238117	3.0568512158954797	3.4410823690332912	3.0951834732400174	0.0	0.0	0.0	lckgfp_s403	0
lckgfp_s404	2.9492084081510015	2.5700416150612515	3.2828163654737263	0.0	3.3879830911384223	0.0	0.0	2.3019651341447287	3.036681363774073	3.0071959362987934	2.780653866530074	2.763635962527548	0.0	0.0	0.0	lckgfp_s404	0
lckgfp_s405	2.3407167657863255	2.7883104799225844	2.730921545533442	2.6785781228885397	3.8775286843564696	3.251336220435869	3.299897454903325	2.968335000794578	0.0	2.981413136631588	2.6560090993715972	3.6605727851499545	0.0	0.0	0.0	lckgfp_s405	0
lckgfp_s412	2.072543511962322	0.0	3.526695911857872	2.417305107348417	1.0575135242297966	0.0	0.0	3.1856702752925443	3.570333436960024	0.0	3.698576051432663	2.6406498749965177	0.0	0.0	0.0	lckgfp_s412	0
lckgfp_s415	1.8054453455775328	0.0	3.0679868755316666	2.806077234934608	3.448391194486454	3.0567803284723873	2.8258410531765086	2.13581284625699	0.634486989402339	2.4658117109000814	0.0	4.132126594012959	0.0	0.0	0.0	lckgfp_s415	0
lckgfp_s416	2.906996747044088	3.21853845875365	0.0	3.191535479827202	3.1137592655916935	0.0	3.150918523976634	2.5545358665490965	3.153989614352846	2.990668810016574	2.540801190037318	2.7622426923654477	0.0	0.0	0.0	lckgfp_s416	0
lckgfp_s418	2.226023009533522	3.129565055869696	3.2769705718289543	2.485385937614822	2.958285136837538	2.833018749051738	3.2739800469507085	2.9648088684385128	0.0	0.0	3.2581616494999284	3.4252316684512047	0.0	0.0	0.6080203399281817	lckgfp_s418	0
lckgfp_s419	3.1728548266028613	2.4635128753055775	3.320071213732195	0.0	3.0382259039389465	3.2500804175640856	3.1123509058738055	0.0	2.723452217789332	3.1983293109057467	3.5679266403025167	3.564119826217058	0.0	0.0	0.0	lckgfp_s419	0
lckgfp_s421	0.5806001591731158	0.9741179549655086	2.470926085787877	1.7350866929790172	2.862162541378707	3.0539546241205278	2.8818056533958463	2.9316480519292005	2.546411784656679	3.399776389753017	0.0	2.699554142897474	3.3958741547807647	3.2867095584395303	1.4193668802933828	lckgfp_s421	1
lckgfp_s423	2.5738742981419143	2.424046920145459	3.7269346274254214	2.5428405518076054	3.2515922028183635	2.870850290579137	3.243780087287783	1.2764105118731381	3.2686720145570716	3.526315293829636	0.0	2.853048983379	3.43890815064662	2.7226255606952536	1.8364114091855697	lckgfp_s423	1
lckgfp_s424	2.7511668977426855	2.98246762213125	3.2762056602944942	2.8063689561709193	3.306248529605583	3.5560736791762313	3.503250189793088	2.1812230956207403	3.2142939837388993	2.775151423848034	3.2054416363529383	3.4435851660117165	0.0	0.0	0.6126016857470553	lckgfp_s424	0
lckgfp_s429	2.670744074242157	3.1084378847941916	3.035439462823411	2.7605070164804495	2.9394565675362694	3.3855546058057353	3.5452573391860014	3.2927374559347355	2.8049395051995036	3.1028020400936227	3.400813910088409	0.0	0.0	0.0	0.9673136664314929	lckgfp_s429	0
lckgfp_s430	2.9320990243966194	0.0	3.7246122154694987	1.5623786446399957	3.4852540564479146	3.026140458061702	3.2753046251569833	2.482667266376879	3.0910719200318035	3.2318125278871217	0.0	0.0	3.662976499681617	2.6109672389665235	1.9871223105193643	lckgfp_s430	1
lckgfp_s432	1.4869083386790163	3.16857144331043	0.0	0.0	3.0273201834825922	2.9665560841224283	3.468762987094694	3.331321740208817	1.6353043755144059	2.205082050195916	2.6586122742828326	0.0	0.0	0.0	0.0	lckgfp_s432	0
lckgfp_s439	3.2561066107008845	3.23181938801995	3.1152115130964075	2.822806043253967	3.6214575603839774	3.1849739017475103	0.0	0.0	0.0	2.2701572814244537	2.9451096556017036	3.5684752989612365	0.0	0.0	1.307113658725011	lckgfp_s439	0
lckgfp_s440	2.550582613981899	3.0453545878303916	3.592147832547569	2.080555147430312	3.2812796822874715	0.0	3.205977110868603	2.906256241380813	1.2149471100013016	0.0	2.647248084709204	3.7233233632075367	0.0	0.0	0.0	lckgfp_s440	0
lckgfp_s442	2.5942245486537696	0.0	3.7424000253189376	1.6793172294594734	3.3582978035908364	3.1195552609220214	2.880443484763691	2.3173240086711213	2.001838034343883	3.179510635790315	0.0	0.0	3.38770380543261	1.3116463433582657	2.4927175369716683	lckgfp_s442	1
lckgfp_s444	2.8485052087465377	0.0	3.94857888766072	2.976468312652238	3.743650059868578	0.0	0.0	2.3298764386433586	0.0	2.7344063599888515	3.0649724193610144	3.6391426935300606	0.0	0.0	0.0	lckgfp_s444	0
lckgfp_s446	2.7694640345286787	2.748691769904808	0.0	2.432206856787785	3.0358160294097494	3.5059786487352977	3.517679331742548	2.9245247432241874	0.9815281276568372	0.0	3.139188541010062	3.5001257951110327	0.0	0.0	0.4340444910788047	lckgfp_s446	0
lckgfp_s447	2.4889837578104674	3.3857660751274863	0.0	2.846821504848487	2.272206736876384	3.26012378817791	3.819299521834848	1.796296384631469	3.1884914612927338	2.0248883845279555	3.124881392511143	3.6801452180003786	0.0	0.0	1.0354133991300487	lckgfp_s447	0
lckgfp_s448	3.0413310601718084	0.0	3.873515136225706	2.390112339602979	2.631072713224802	3.315679955462387	2.7196690308038263	3.1695485126331664	2.8997744377029706	3.2489865449150703	2.625756417490072	0.0	3.723046972025479	2.9871355873950565	1.8621281637547027	lckgfp_s448	1
lckgfp_s453	1.973260867202868	2.8955126133857934	3.883123177532727	3.090857831497127	3.120010208866643	2.5262147351312367	3.2992492597276897	3.1900511757129424	2.2632487863875443	3.219299584312339	3.363257273672484	0.0	3.841418794078066	3.0947731400493677	2.2805299768774994	lckgfp_s453	1
lckgfp_s455	2.5343453227564887	3.5153686615314204	2.823019392051597	2.710188492827486	3.2189429795001225	3.057595366250019	3.202353938053782	2.904291909113632	0.0	2.948537085472946	2.8678736243445315	2.9183920615742496	0.0	0.0	0.0	lckgfp_s455	0
lckgfp_s456	1.9558117747008739	3.0088785024546483	2.4964318182289125	0.16035715385755037	2.9486338403693475	1.1305142294537056	3.4012443830844483	3.4088011863984904	0.0	3.100848321410487	3.880146364223777	3.4757129605763373	0.0	0.0	0.0	lckgfp_s456	0
